# Supplementary material for: Direct Observation of Hydrangea Blue-Complex Composed of 3-<em>O</em>-glucosyldelphinidin, Al<sup>3+</sup> and 5-<em>O</em>-acylquinic Acid by ESI-Mass Spectrometry
Source: Preprints.org preprint supplement (doi:10.20944/preprints201805.0181.v1), 2018-05-11
Supplement: Supplementary file 1 [file supplementary]

# Direct observation of hydrangea blue-complex composed of delphinidin 3-O-glucoside, Al<sup>3+</sup> and 5-O-caffeoylquinic acid by ESI Mass Spectrometry

Takaaki Ito <sup>1</sup>, Kin-ichi Oyama <sup>2</sup> and Kumi Yoshida <sup>3,\*</sup>

<sup>1</sup> Graduated School of Information Sciences, Nagoya University, Chikusa, Nagoya 464-8601, Japan; ito.takaaki@b.mbox.nagoya-u.ac.jp

<sup>2</sup> Research Institute for Materials Science, Nagoya University, Chikusa, Nagoya 464-8602, Japan; oyama@cic.nagoya-u.ac.jp

<sup>3</sup> Graduated School of Informatics, Nagoya University, Chikusa, Nagoya 464-8601,

\* Correspondence: yoshidak@i.nagoya-u.ac.jp; Tel.: +81-052-789-5638

## 1. Supplemental figures

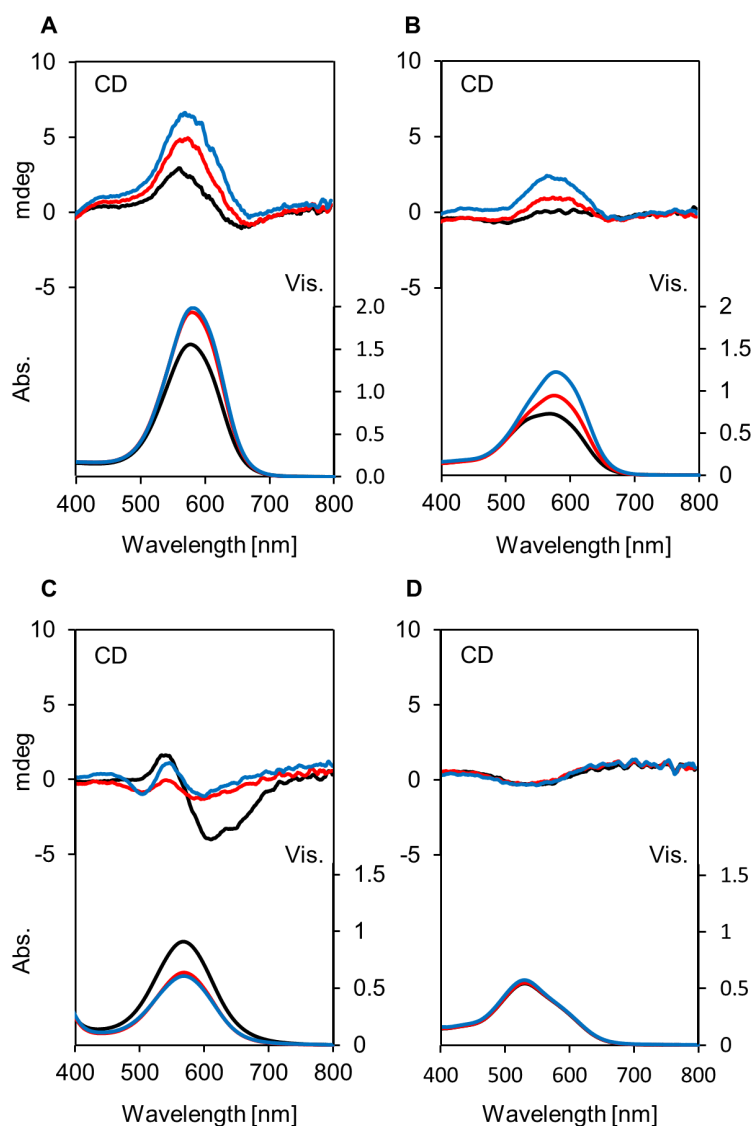

**Figure S1.** Visible and CD spectra of reproduced solutions by mixing **1** (Dp3G, 0.1 mM) and Al<sup>3+</sup> (1 eq.) with 1-3 eq. of co-pigment, 5pCQ (**3**), or 3CQ (**4**) in buffered solutions of 2 mM. —: 1 eq., —: 2 eq., —: 3 eq. (A) With 5pCQ (**2**) at pH 4.0. (B) With 5pCQ (**2**) at pH 3.2. (C) With 3CQ at pH 4.0. (D) With 3CQ at pH 3.2.

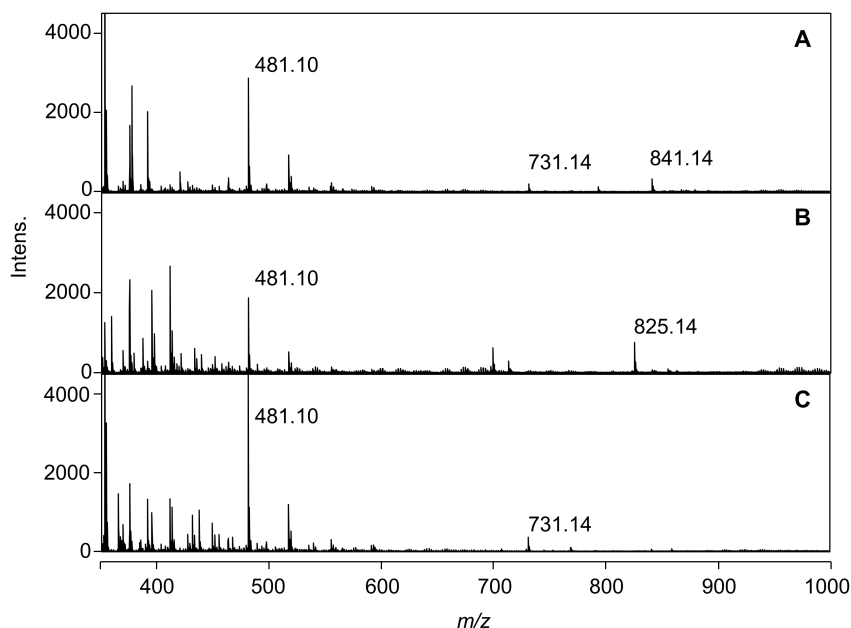

**Figure S2.** Negative detection ESI-TOF-MS spectra of reproduced solutions by mixing **1** (Dp3G, 0.1 mM) and  $\text{Al}^{3+}$  (1 eq.) with 2 eq. of co-pigment, 5CQ (**2**), 5pCQ (**3**), or 3CQ (**4**) in buffered solutions at pH 4.0 (2 mM). (A) 5CQ (**2**). (B) 5pCQ (**3**). (C) 3CQ (**4**).

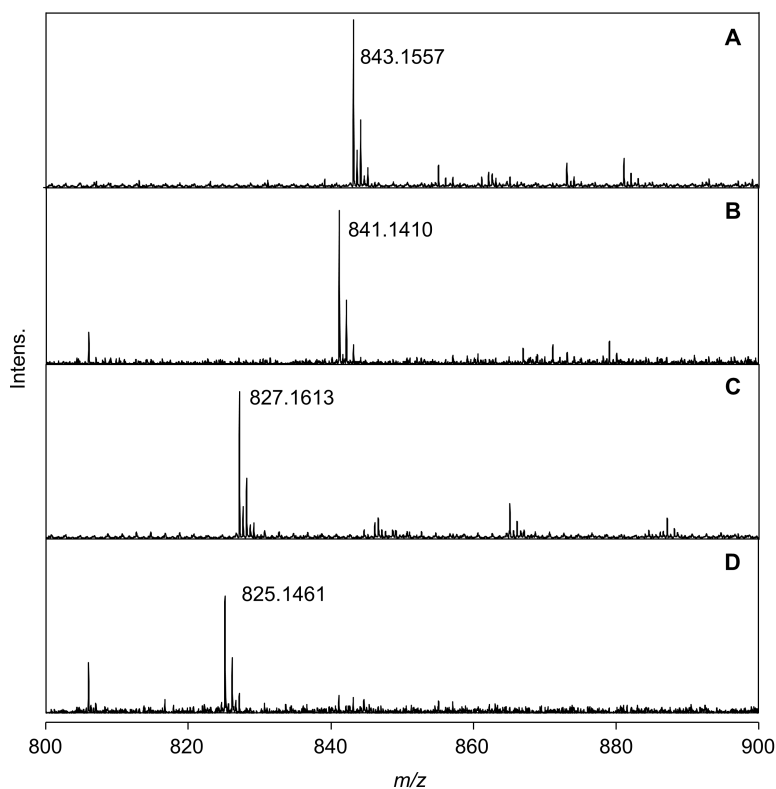

**Figure S3.** High resolution ESI-TOF-MS spectra of reproduced solutions by mixing **1** (Dp3G, 0.1 mM) and  $\text{Al}^{3+}$  (1 eq.) with 2 eq. of co-pigment, 5CQ (**2**), 5pCQ (**3**) in buffered solutions at pH 4.0. (A) Positive mode, 5CQ (**2**), calcd. for  $\text{C}_{37}\text{H}_{36}\text{O}_{21}\text{Al}$   $[\text{M}+\text{H}]^+$  843.1559, found 843.1557. (B) Negative mode, 5CQ (**2**), calcd. for  $\text{C}_{37}\text{H}_{34}\text{O}_{21}\text{Al}$   $[\text{M}-\text{H}]^-$  841.1413, found 841.1410. (C) Positive mode, 5pCQ (**3**), calcd. for  $\text{C}_{37}\text{H}_{36}\text{O}_{20}\text{Al}$   $[\text{M}+\text{H}]^+$  827.1610, found 827.1613. (D) Negative mode, 5pCQ (**3**), calcd. for  $\text{C}_{37}\text{H}_{34}\text{O}_{20}\text{Al}$   $[\text{M}-\text{H}]^-$  825.1464, found 825.1461.

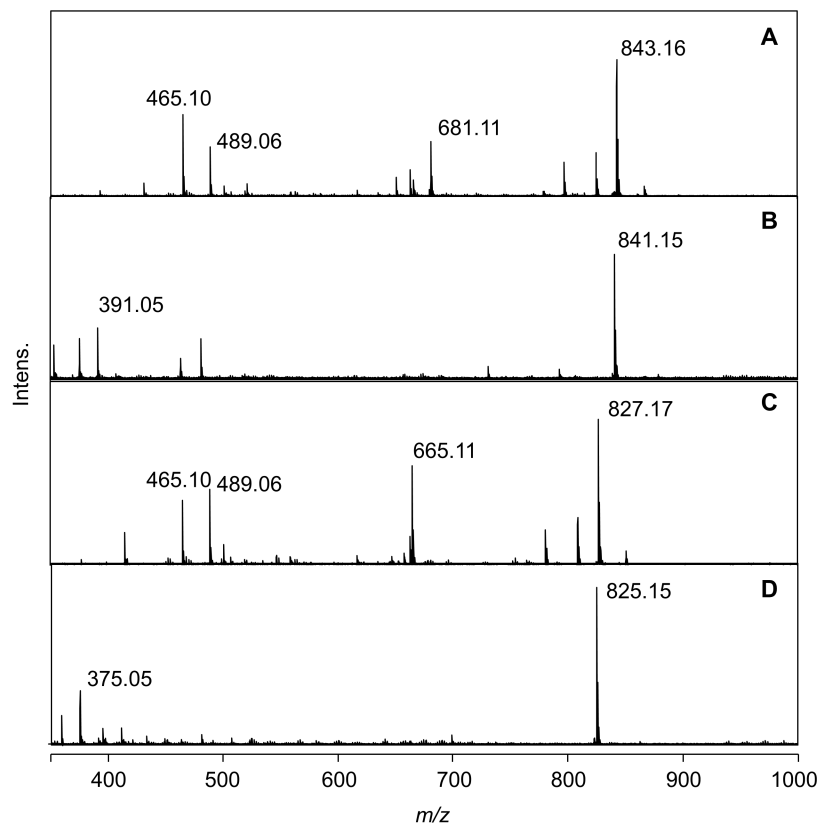

**Figure S4.** ESI-TOF-MS/MS spectra of the blue complex reproduced by mixing **1** (Dp3G, 0.1 mM) and  $\text{Al}^{3+}$  (1 eq.) with 2 eq. of co-pigment, 5CQ (**2**) or 5pCQ (**3**) in buffered solutions at pH 4.0 (2 mM). (A) Dp3G-Al-5CQ (positive mode, collision energy: 20 eV). (B) Dp3G-Al-5CQ (negative mode, collision energy: 30 eV). (C) Dp3G-Al-5pCQ (positive mode, collision energy: 20 eV). (D) Dp3G-Al-5pCQ (negative mode, collision energy: 30 eV).

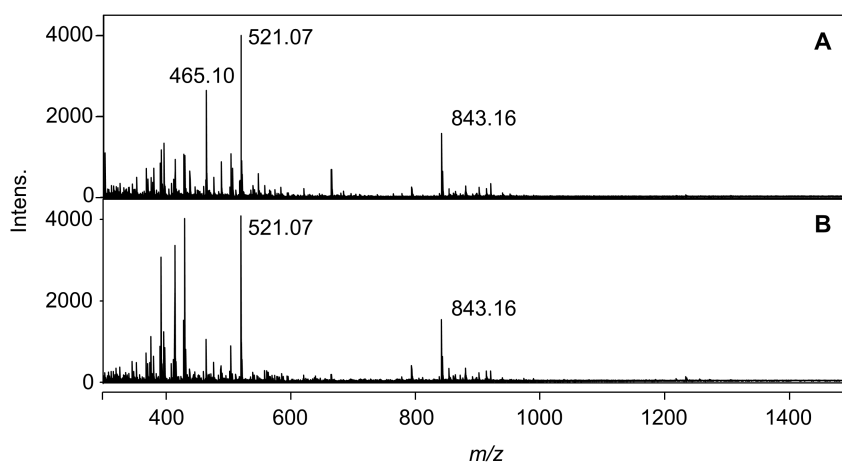

**Figure S5.** Positive detection ESI-TOF-MS spectra of reproduced solutions by mixing **1** (Dp3G, 0.1 mM) and  $\text{Al}^{3+}$  (1 eq.) with 1 and 3 eq. of co-pigment, 5CQ (**2**) in buffered solutions at pH 4.0 (2 mM). (A) 1 eq., (B) 3 eq.

## 2. Elemental analysis of blue hydrangea cell sap

Metal contents in cell sap from hydrangea sepal was performed by Inductively coupled plasma-optical emission spectrometry (ICP-OES) analysis after wet ashing. 100  $\mu\text{L}$  cell sap was collected into a PTFE tube, then added 2.5 mL  $\text{HNO}_3$  ( $d=1.38$ , for metal analysis grade, WAKO) and heated at 105  $^\circ\text{C}$  for 2 hours in Digi-PREP Cube (SCP Science). Next 200  $\mu\text{L}$  30%  $\text{H}_2\text{O}_2$  (WAKO) was added and heated at 160  $^\circ\text{C}$  for 16 hours. After cooling the solution was messed up to 20 mL and filtered with cellulose acetate filter (0.45  $\mu\text{m}$ , TOYO Roshi). ICP-OES analysis was performed with Vista-PRO (VARIAN). The concentration of each metal was determined with calibration curves from standard solution (ICP multi-element standard solution IV, Merck). The result is summarized in Table S1.

**Table S1.** Metal contents in cell sap from blue hydrangea sepal.

| Metal | Conc. [mM] |
|-------|------------|
| Na    | 0.93       |
| Mg    | 5.2        |
| Al    | 2.9        |
| K     | 30.0       |
| Ca    | 2.4        |
